# Supplementary material for: Magnetic and electrical bistability in hybrid composites of conducting organic polymers with [Fe(NH2-trz)3]n[SO4]n
Source: Royal Society of Chemistry journal article supplement (doi:10.1039/d3tc00595j), 2023-01-01
Supplement: d3tc00595j1.pdf [file d3tc00595j1.pdf]

## Magnetic and electrical bistability in hybrid composites of conducting polymers with $[\text{Fe}(\text{NH}_2\text{-trz})_3]_n[\text{SO}_4]_n$

David Nieto-Castro, <sup>\*a</sup> Anna Graf, Francesc Gispert-Guirado<sup>b</sup> and José Ramón Galán-Mascarós<sup>\*a,c</sup>

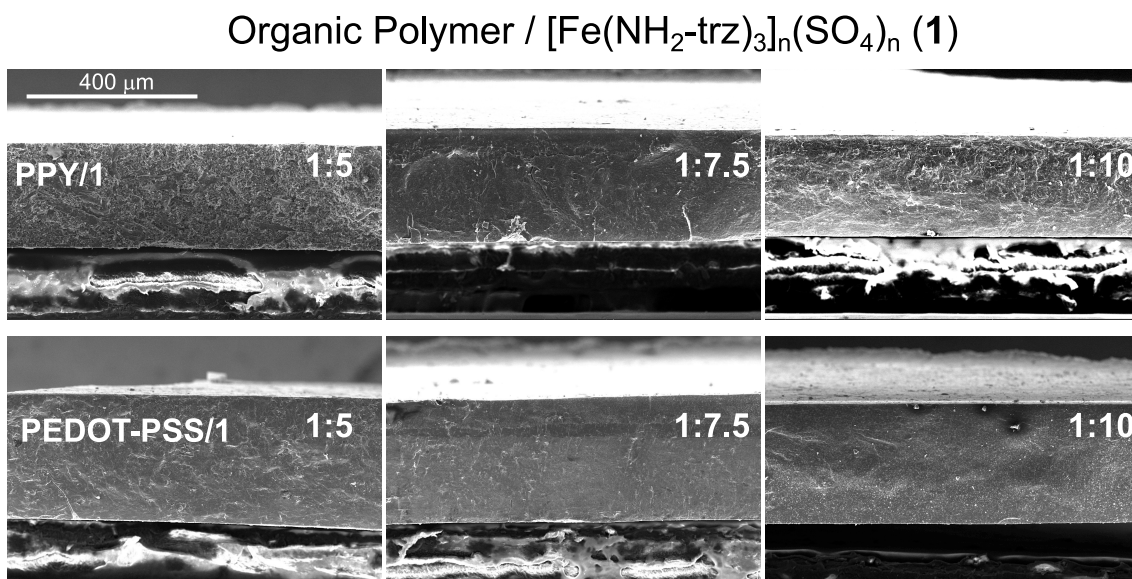

Figure S1. ESEM cut section images of organic polymer/1 composites.

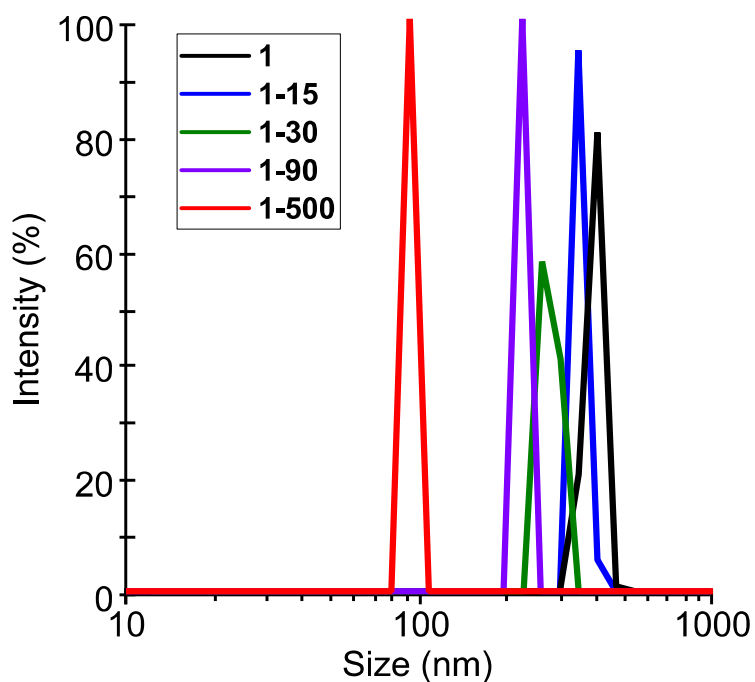

Figure S2. Particle size distribution for colloidal suspensions of **1**, **1-15**, **1-30**, **1-90** and **1-500** determined by DLS analysis

**Table S1.** Average particle size distribution for each sample as determined by DLS

| Sample       | Size (nm) |
|--------------|-----------|
| <b>1</b>     | 385.6     |
| <b>1-15</b>  | 345.0     |
| <b>1-30</b>  | 314.6     |
| <b>1-90</b>  | 220.2     |
| <b>1-500</b> | 91.3      |

#### Crystal Structure of $[\text{Fe}(\text{NH}_2\text{trz-trz})_3]_n[\text{SO}_4]_n$ in HS

The crystal structure of  $[\text{Fe}(\text{NH}_2\text{-trz})_3]_n[\text{SO}_4]_n$  (**1**) in the LS state was reported with a  $P6_3/m$  space group with two formula units per cell. We were able to obtain the PXRD diffractogram of **1** at 400 K (HS state). The PXRD analysis was performed from  $8$  to  $72^\circ$   $2\theta$  with a step size of  $0.03^\circ$  with different acquisition times (for  $8$ – $70^\circ$  at 12s, for  $40$ – $52^\circ$  at 24s and for  $52$ – $72^\circ$  at 30s) in order to enhance the peak/noise ratio. The three patterns were refined simultaneously, TOPAS 6.0 based on the Rietveld method,<sup>1</sup> with the  $P6_3/m$  space group. Figure S4.3 shows the coordination network where Fe(II) centers are connected by 4– $\text{NH}_2$ –1,2,4–triazole molecules, creating a polymer chain. The sulfate counteranions are disordered between two positions in the interspace among the polymer chains. The main differences with the structure in the LS state are a higher cell volume due to the population of the Fe(II)  $e_g$  orbitals that have an antibonding character and interact with nitrogen orbitals, and a bending in the angle of the 4– $\text{NH}_2$ –1,2,4–triazole amino radical.

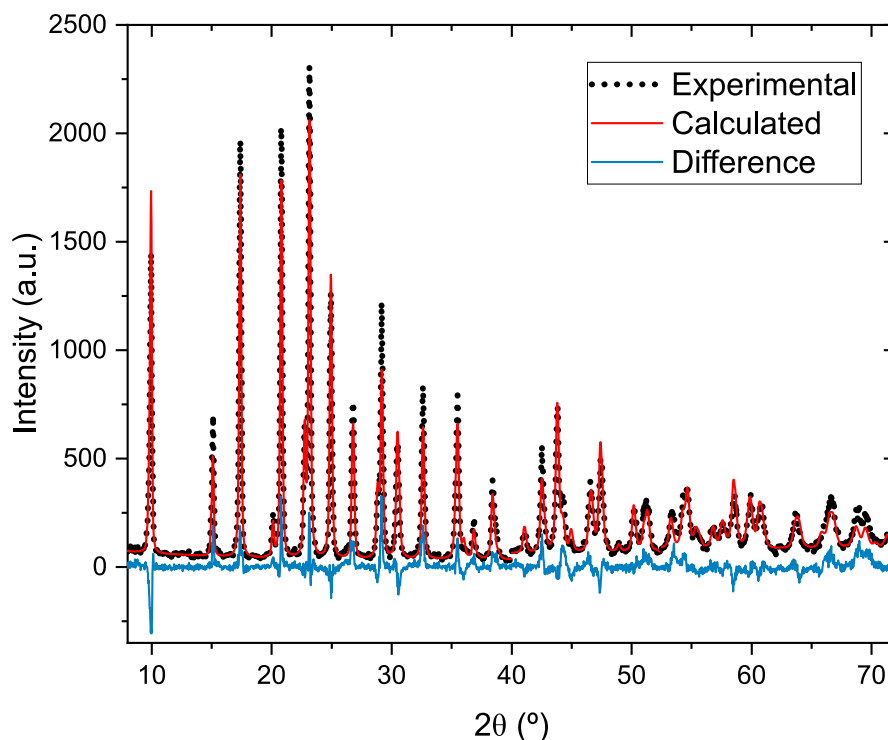**Figure S3.** Experimental (black dots) and calculated (red line) diffraction patterns of **1** in the HS state. The difference pattern divided by signal to noise ratio is shown as a blue line.

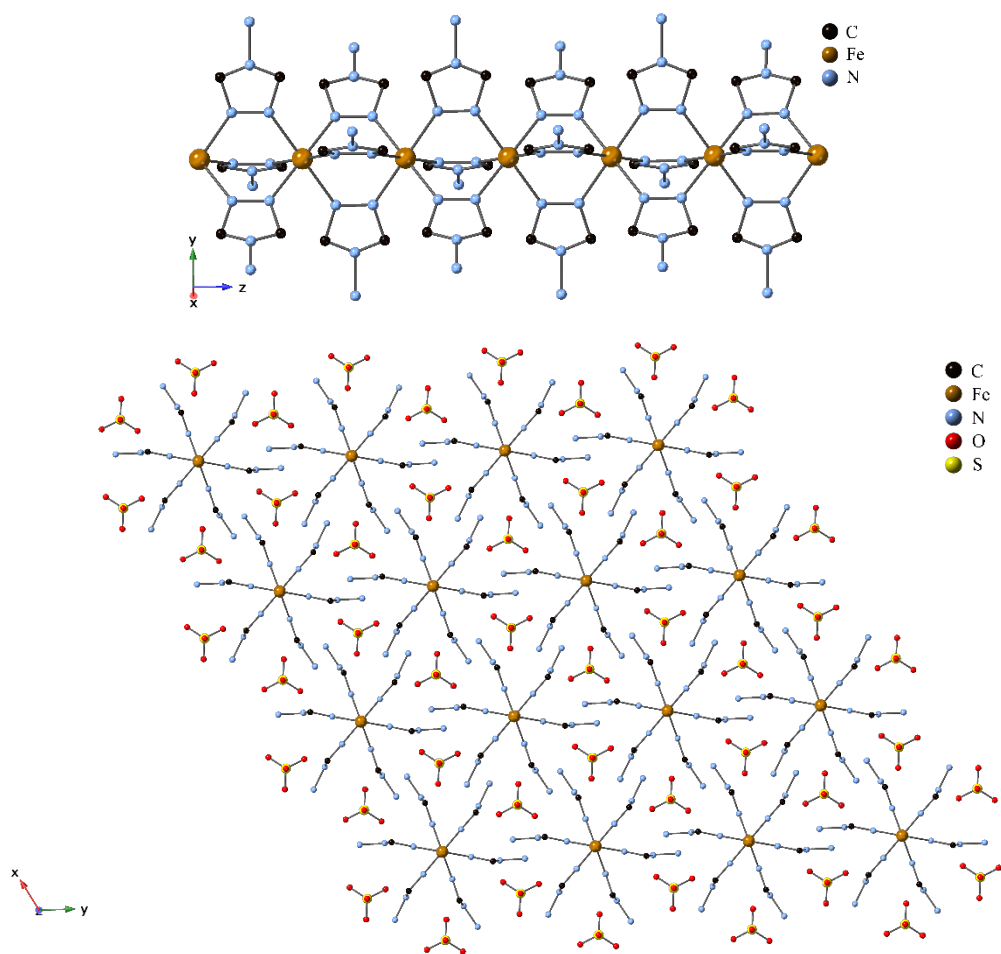

**Figure S4.** Crystal structure of  $[\text{Fe}(\text{NH}_2\text{-trz})_3]_n[\text{SO}_4]_n$  (**1**) in the HS state along the z axis (top) and crystal packing of the polymer chains along the y axis (bottom).

**Table S2.** Crystal unit cell and Rietveld refinement data obtained for **1** in HS.

|                 |                             |                              |            |
|-----------------|-----------------------------|------------------------------|------------|
| Temperature     | 400 K                       | Z                            | 2          |
| Crystal system  | Hexagonal                   | 2 $\theta$ Angular range [°] | 8–72       |
| Space group     | $P6_3/m$                    | $R_{\text{wp}}$              | 15.68      |
| Cell parameters | $a = b = 10.1196(6)$        | $R_{\text{p}}$               | 12.68      |
|                 | $c = 7.7716(6)$             | Volume [ $\text{\AA}^3$ ]    | 689.23(10) |
|                 | $\alpha = \beta = 90^\circ$ |                              |            |
|                 | $\gamma = 120^\circ$        |                              |            |

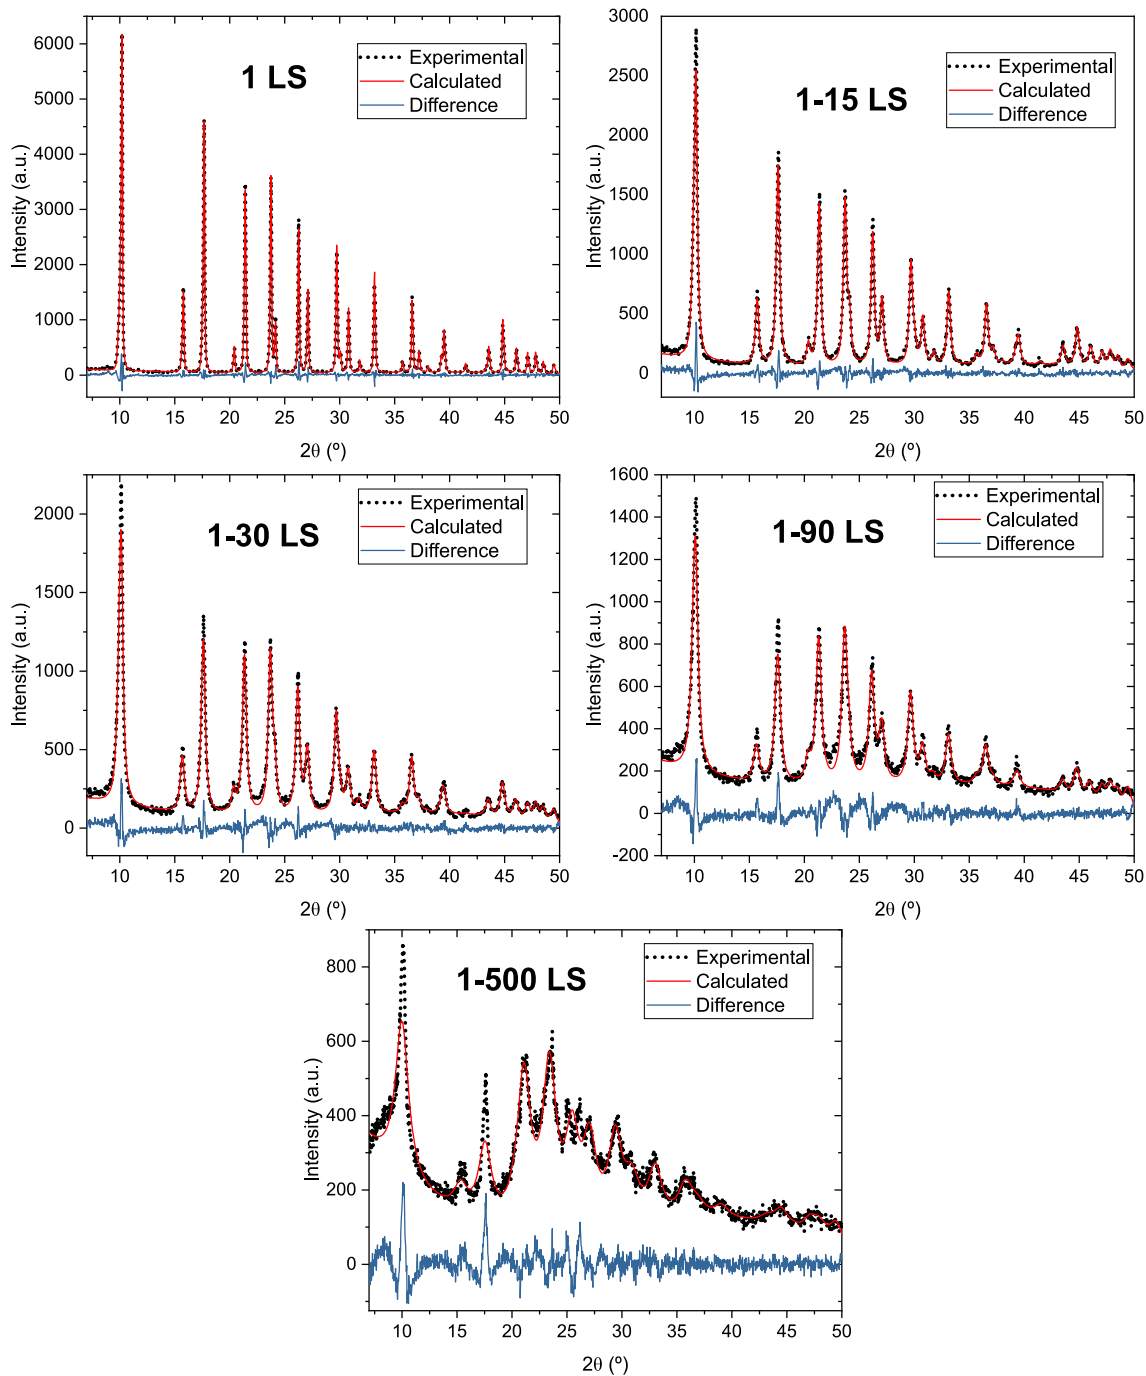

**Figure S5.** Pawley refinement plot of X-ray Diffraction data of **1** and its milled samples in LS.

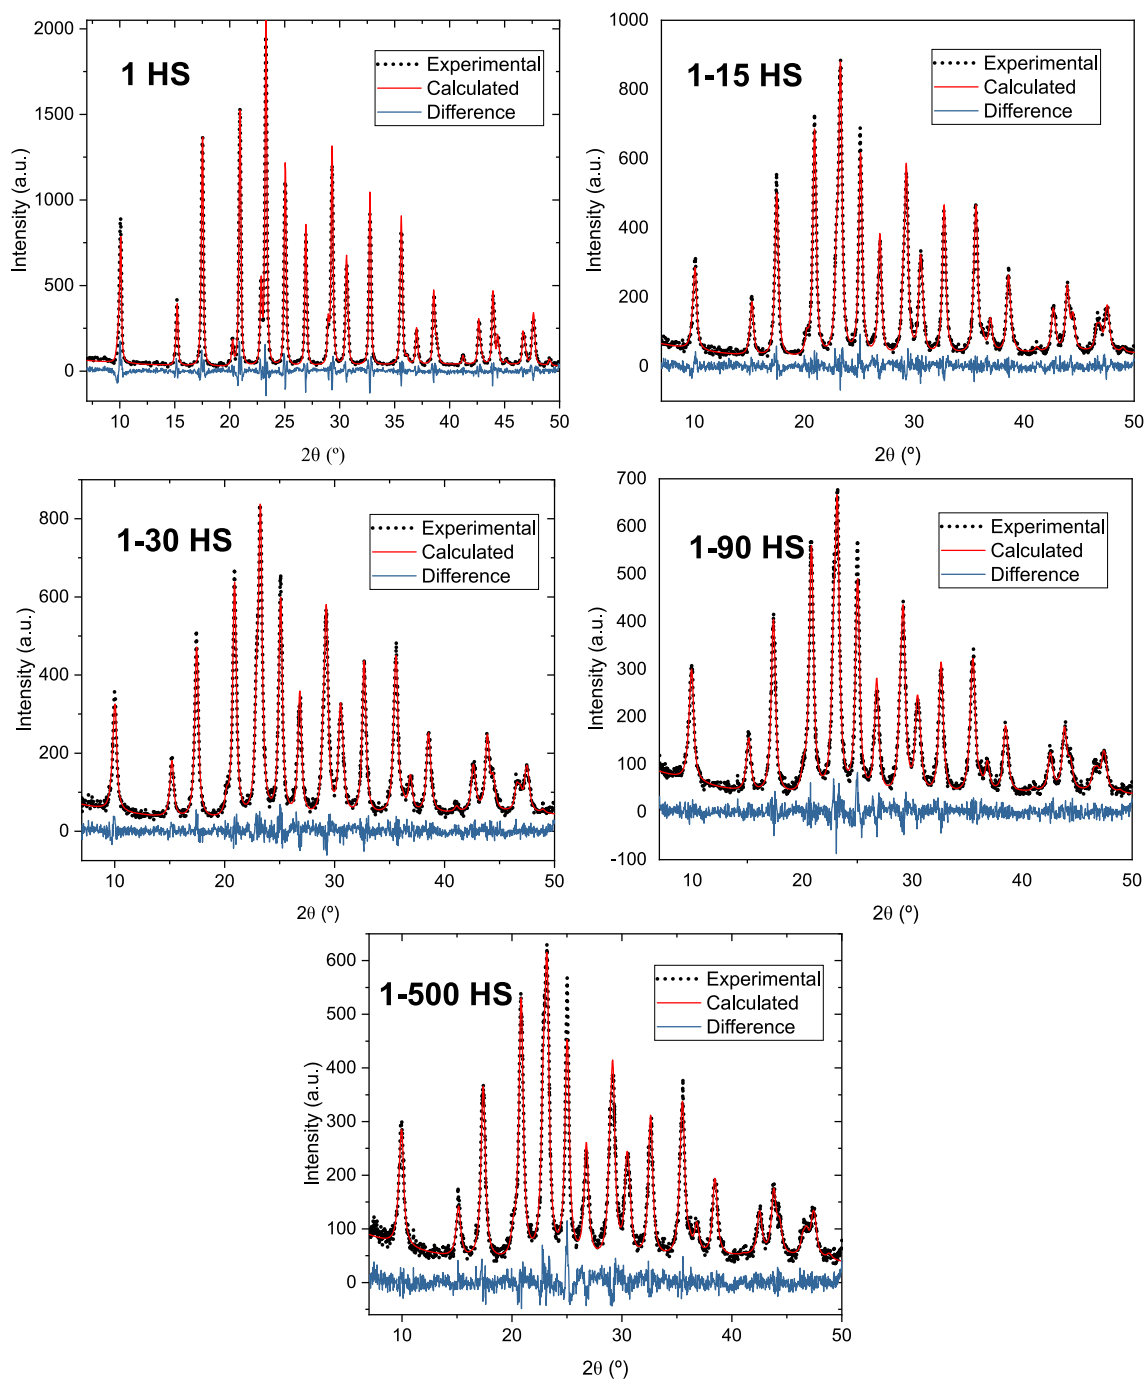

**Figure S6.** Pawley refinement plot of X-ray Diffraction data of **1** and its milled samples in HS.

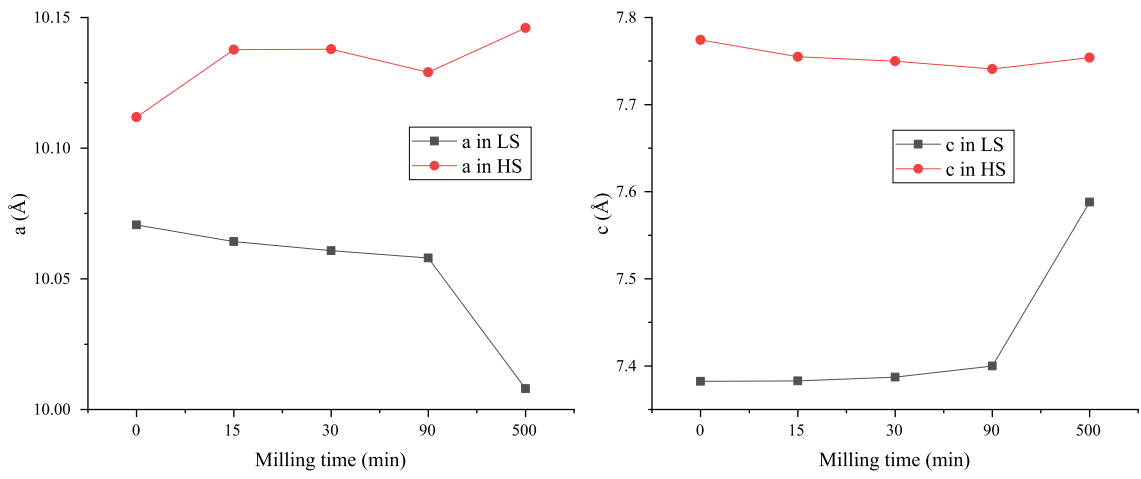

**Figure S7.**  $a$  and  $c$  evolution upon grinding obtained from Pawley refinement.

### Temperature-independent residual paramagnetism corrections

The residual paramagnetic impurities in the SCO systems are very high, we experimentally subtracted the residual slope for every sample using the Curie-Weiss law:

$$\chi = \frac{C}{(T - \theta)} + \chi_{residual} \quad \text{Equation S1}$$

where  $C$  is the Curie constant,  $\theta$  is the correction term or Weiss constant and  $\chi_{residual}$  is the magnetic susceptibility of the residual temperature-independent paramagnetism. The residual corrections were performed subtracting the intercept in the x axis of the plots to the original  $\chi$  values.

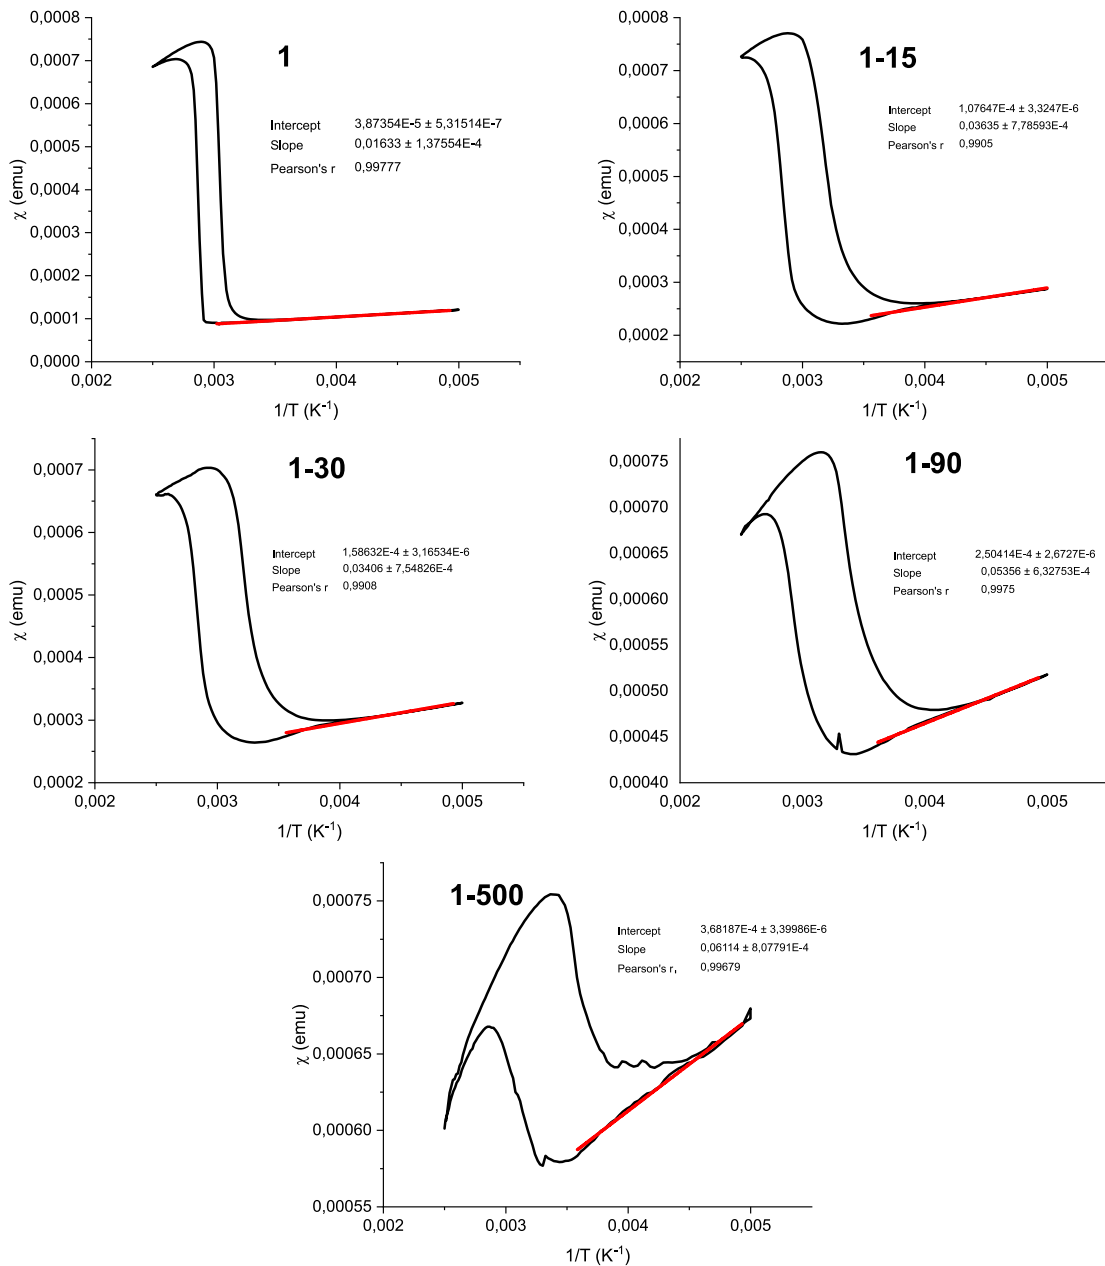

**Figure S8.**  $\chi$  vs  $1/T$  of the last cycle and the residual temperature-independent paramagnetism correction (red line) of **1** and its milled samples.

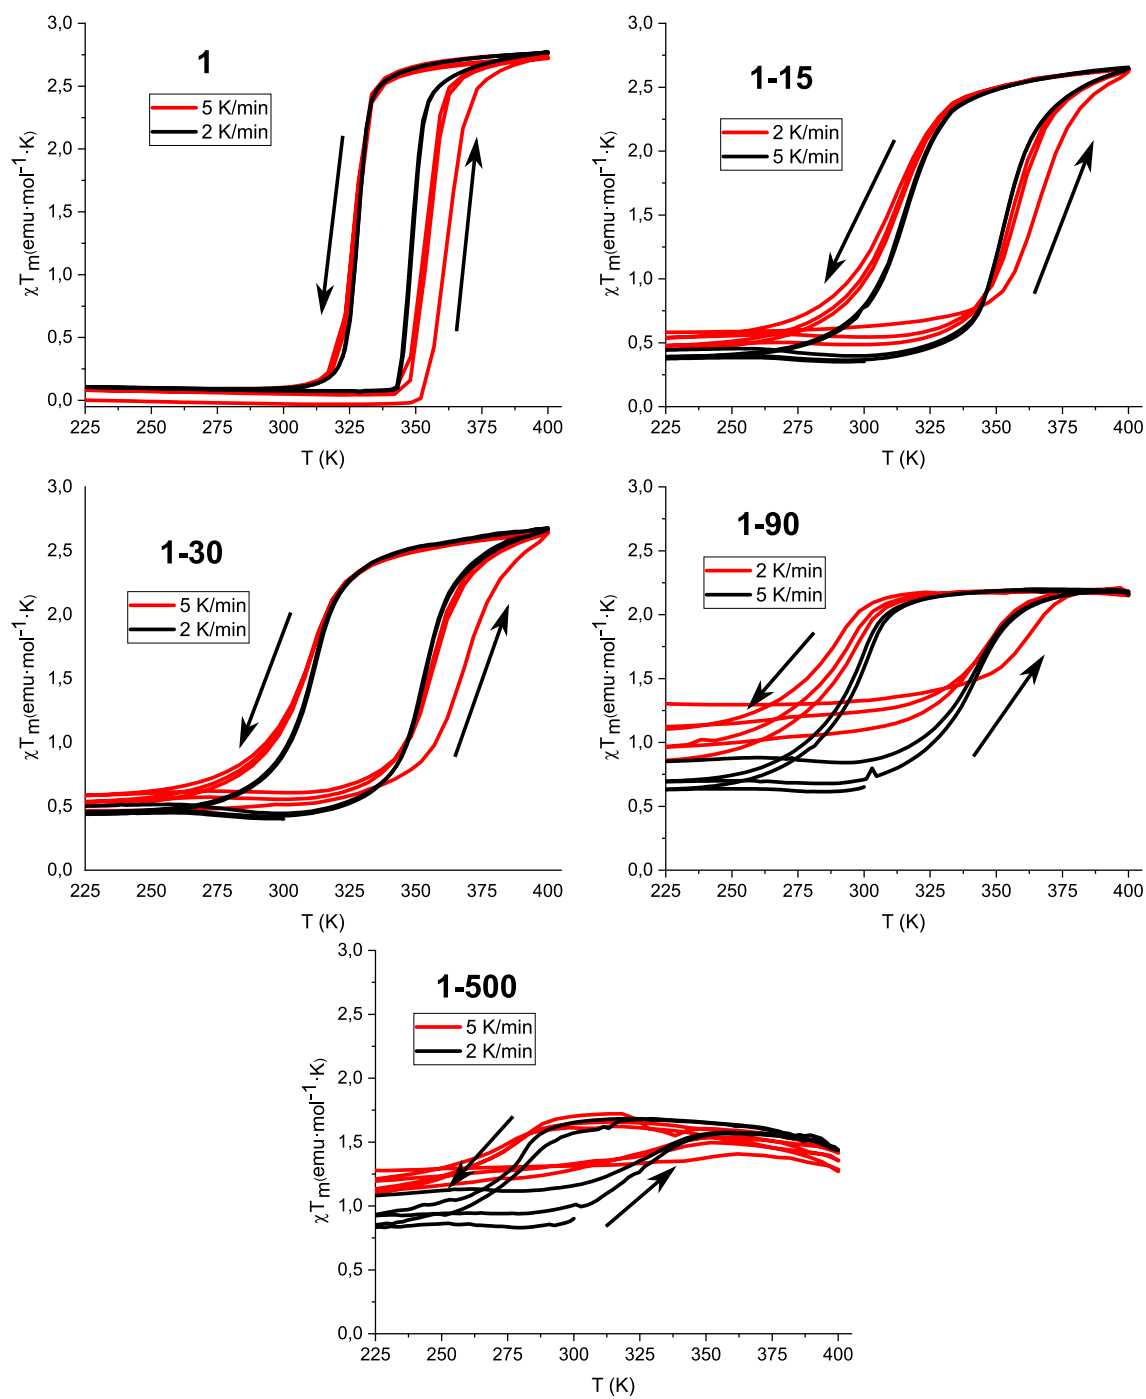

**Figure S9.**  $\chi_m T$  vs  $T$  cycles of **1** and its milled samples in the 225–400 K region (first two cycles were performed at 5 K/min and the rest at 2 K/min).



*Slichter and Drickamer model*

This model is based on the assumption that HS and LS states are statistically distributed and form regular solutions. At equilibrium, this model leads to the equation S2:

$$\ln\left(\frac{1 - \gamma_{HS}}{\gamma_{HS}}\right) = \frac{\Delta H + \Gamma(1 - 2\gamma_{HS})}{RT} - \frac{\Delta S}{R} \quad \text{Equation S2}$$

Where:

$$\gamma_{HS} = \frac{\chi^T - \chi^{T_{LS}}}{\chi^{T_{HS}} - \chi^{T_{LS}}} \quad \Delta H = \frac{|\Delta H^\uparrow| + |\Delta H^\downarrow|}{2} \quad \Delta S = \frac{\Delta H}{T_c}; T_c = \frac{T_{1/2}^\uparrow + T_{1/2}^\downarrow}{2}$$

$\Gamma$ , is the mean field interaction parameter that measures the cooperativity. If  $\Gamma > 2RT_c$ , the transition occurs with hysteresis, when  $\Gamma < 2RT_c$ , the transition is gradual and if  $\Gamma = 2RT_c$ , the transition is abrupt without hysteresis.

Equation S2 was converted into equation S3 for an effective fitting.

$$T = \frac{\Delta H + (1 - 2\gamma_{HS})\Gamma}{S + R \ln\left(\frac{1 - \gamma_{HS}}{\gamma_{HS}}\right)} \quad \text{Equation S3}$$

$\Gamma$  was determined with equation S3 and with the experimental values of  $\gamma_{HS}$  vs  $T$  (figure S11 and S12).

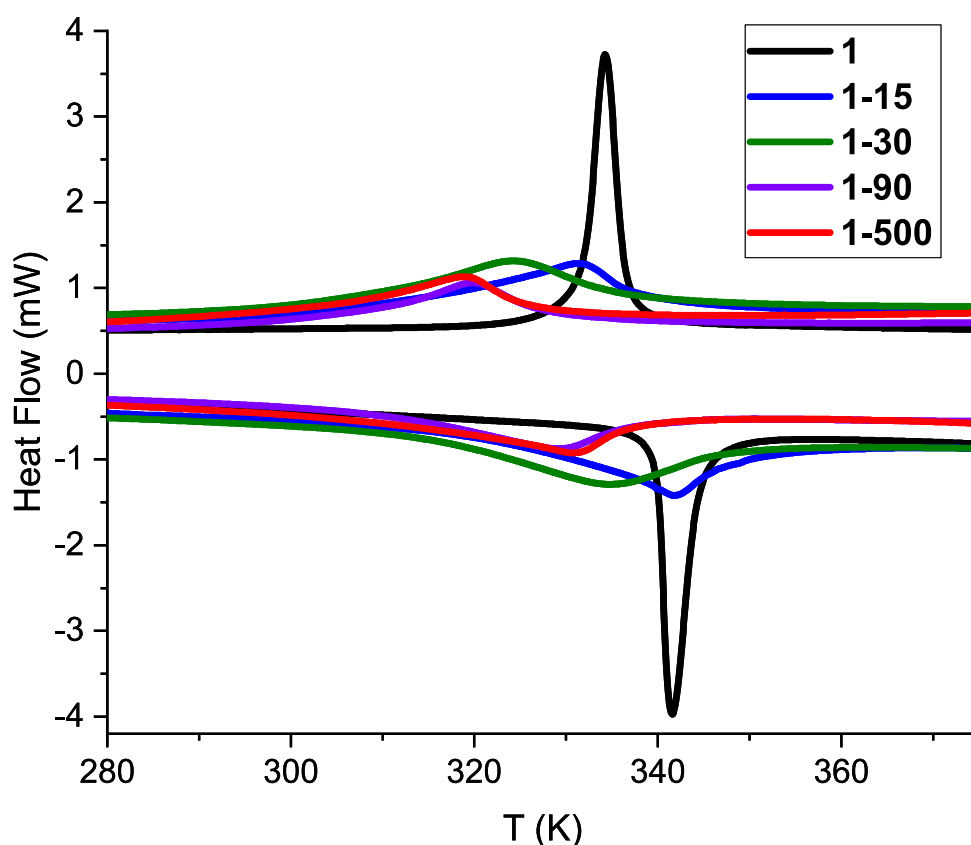

**Figure S10.** DSC cycles in the range from 280 to 375 K (Scan rate 2 K/min) for **1** and all the milled samples.

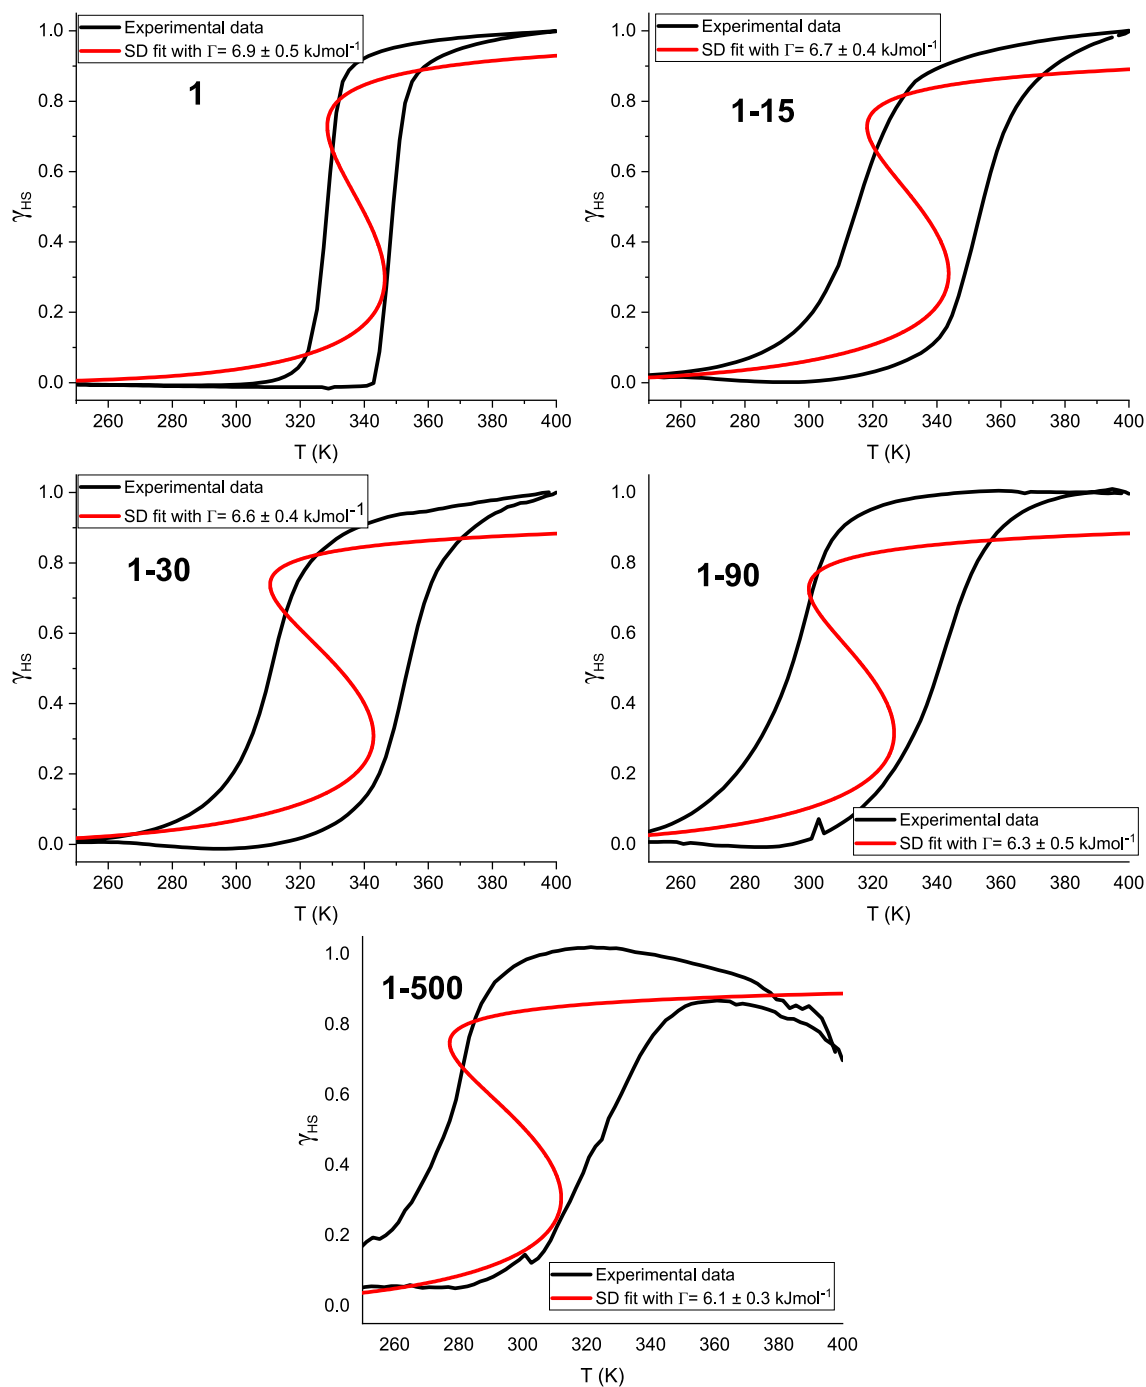

**Figure S11.** Slichter Drickamer fittings of **1** and its milled samples.

**Table S3** parameters for the Slichter and Drickamer modelling of **1**.

| Sample       | $T_{1/2}(\uparrow)$ [K] | $T_{1/2}(\downarrow)$ [K] | $T_c$ [K] | $\Delta H$ [kJ mol <sup>-1</sup> ] | $\Delta S$ [kJ K <sup>-1</sup> mol <sup>-1</sup> ] | $\Gamma$ [kJ mol <sup>-1</sup> ] |
|--------------|-------------------------|---------------------------|-----------|------------------------------------|----------------------------------------------------|----------------------------------|
| <b>1</b>     | 349                     | 329                       | 339       | 14.70                              | 0.044                                              | $6.9 \pm 0.5$                    |
| <b>1-15</b>  | 352                     | 315                       | 334.5     | 8.99                               | 0.027                                              | $6.7 \pm 0.4$                    |
| <b>1-30</b>  | 352                     | 310                       | 331       | 7.84                               | 0.024                                              | $6.6 \pm 0.4$                    |
| <b>1-90</b>  | 340                     | 295                       | 317.5     | 7.41                               | 0.023                                              | $6.3 \pm 0.5$                    |
| <b>1-500</b> | 326                     | 279                       | 301       | 6.56                               | 0.022                                              | $6.1 \pm 0.3$                    |

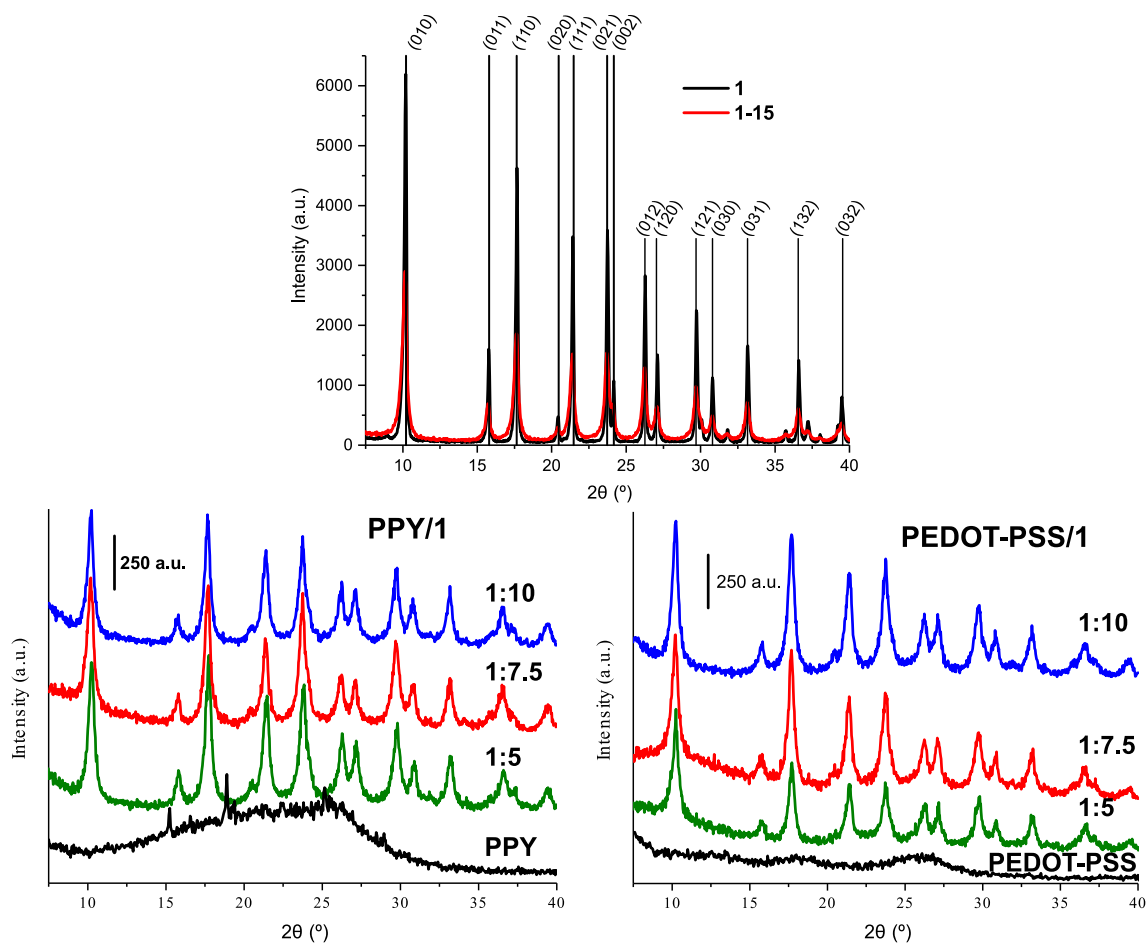

**Figure S12.** PXRD of **1**, **1-15**, the organic polymers and the organic polymer/**1** composites. (ratio Polymer:SCO)

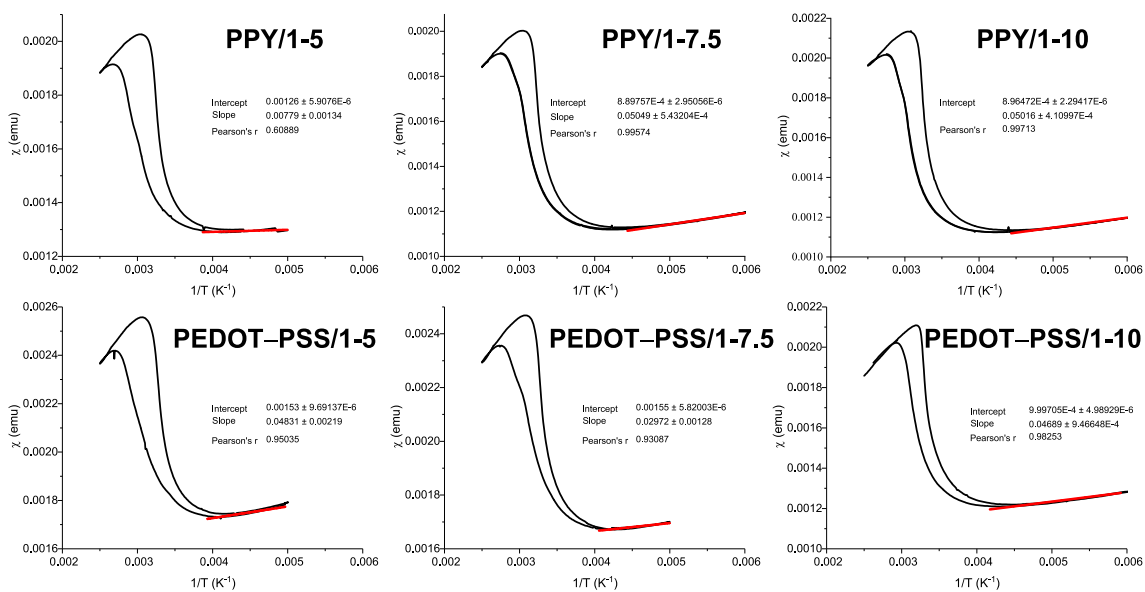

**Figure S13.**  $\chi$  vs  $1/T$  of the last cycle and the residual correction (red line) of the organic polymers/**1**.

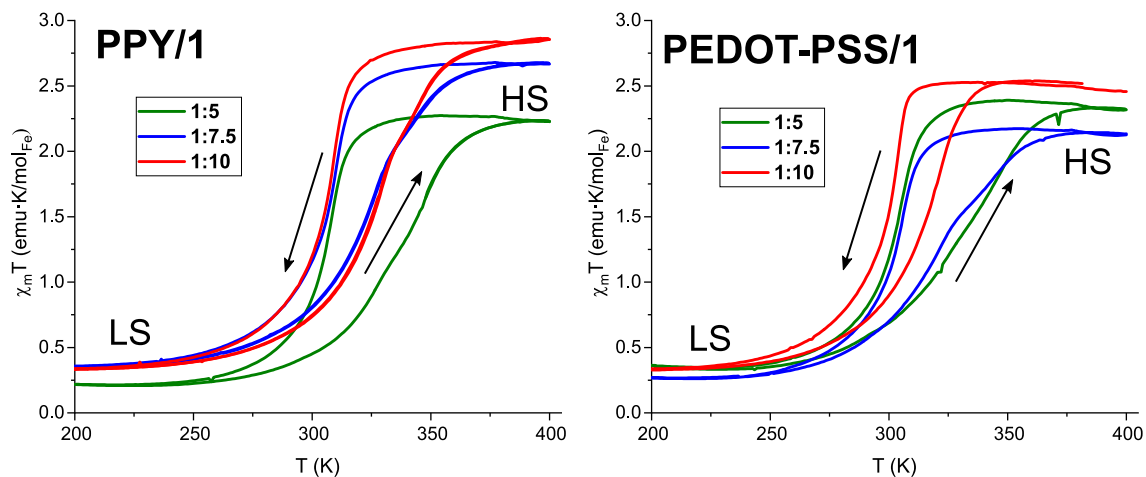

**Figure S14.**  $\chi_m T$  versus  $T$  plots of all the organic polymer/1 composites at a scan rate of 1 K/min in the 200–400 K range (ratio Polymer:SCO).

**Table S4.** Magnetic properties of all the composites (ratio Polymer:SCO).

| Sample             | $T_{1/2}(\uparrow)$ [K] | $T_{1/2}(\downarrow)$ [K] | $\Delta T$ [K] | $\chi_m T(200\text{ K})$<br>[emu·K/mol $_{Fe}$ ] | $\chi_m T(400\text{ K})$<br>[emu·K/mol $_{Fe}$ ] |
|--------------------|-------------------------|---------------------------|----------------|--------------------------------------------------|--------------------------------------------------|
| <b>PPY/1-5</b>     | 339                     | 308                       | 31             | 0.21                                             | 2.23                                             |
| <b>PPY/1-7.5</b>   | 328                     | 309                       | 19             | 0.36                                             | 2.67                                             |
| <b>PPY/1-10</b>    | 330                     | 308                       | 22             | 0.36                                             | 2.86                                             |
| <b>PEDOT/1-5</b>   | 331                     | 303                       | 28             | 0.36                                             | 2.32                                             |
| <b>PEDOT/1-7.5</b> | 327                     | 305                       | 22             | 0.26                                             | 2.12                                             |
| <b>PEDOT/1-10</b>  | 316                     | 301                       | 15             | 0.34                                             | 2.46                                             |

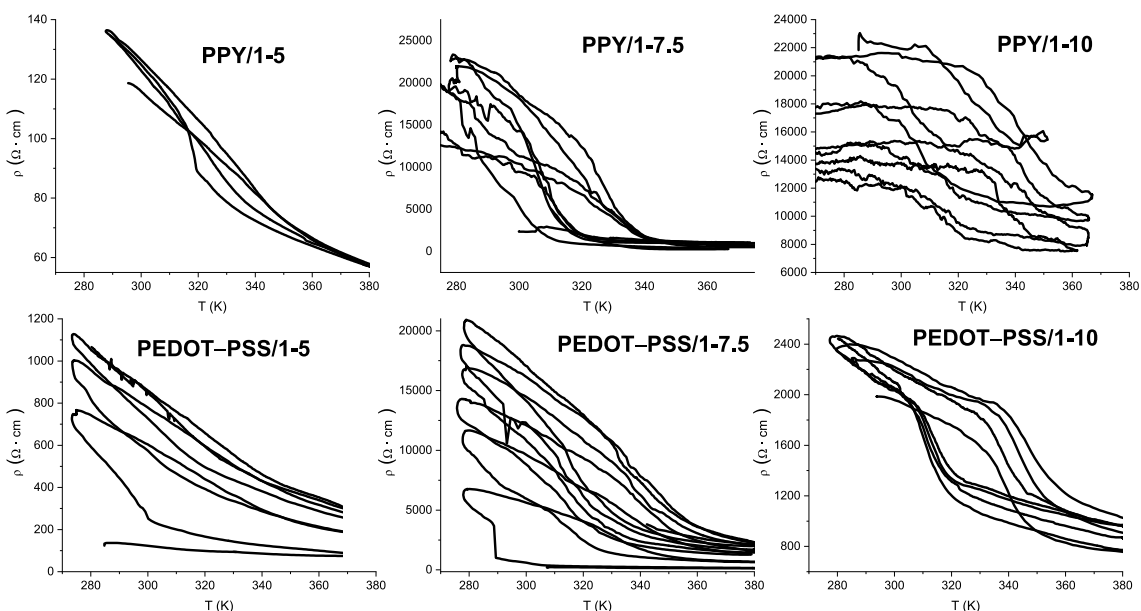

**Figure S15.** Annealing process for organic polymer/1 composites (Resistivity increases every cycle).

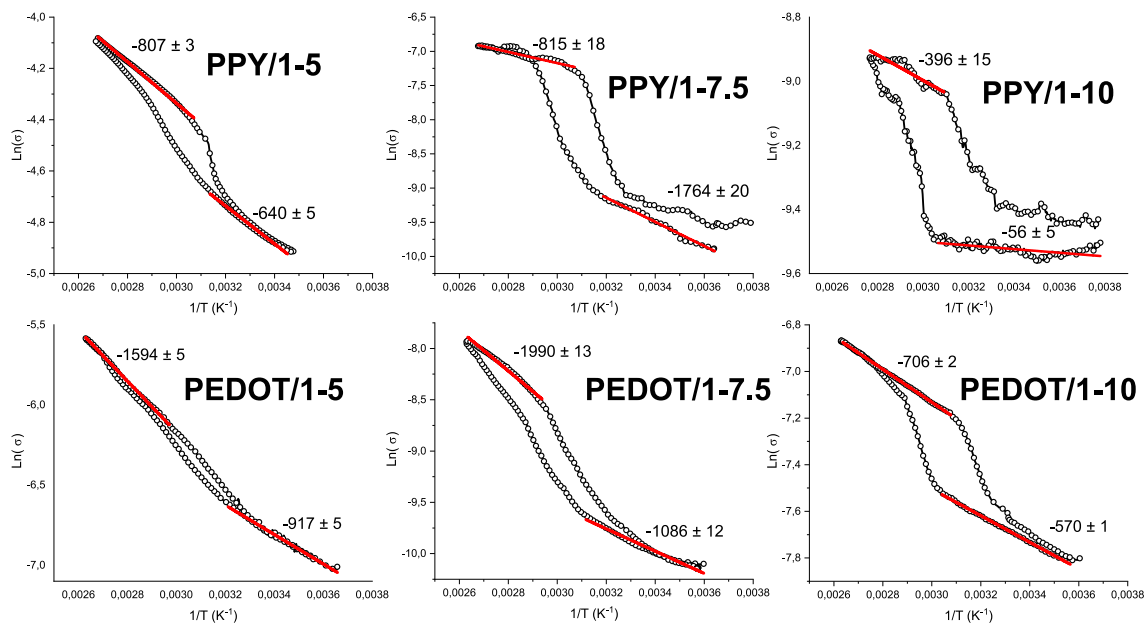

**Figure S16.**  $\text{Ln}(\sigma)$  vs  $1/T$  and Arrhenius fitting for all the composites. (The numbers indicate the slope of the linear fittings).

Arrhenius Law:

$$\text{Ln}(\sigma) = \text{Ln}(\sigma_0) + \frac{-E_a}{k} \cdot \frac{1}{T}$$

Where  $\sigma_0$  is the preexponential factor,  $k$  the Boltzmann constant ( $8.62 \times 10^{-5}$  eV/K) and  $E_a$  the activation energy.

**Table S5.**  $E_a$  values in HS and LS obtained from the Arrhenius fitting.

| Sample      | $E_a$ LS (eV) | $E_a$ HS (eV) |
|-------------|---------------|---------------|
| PPY/1-5     | 0.055         | 0.069         |
| PPY/1-7.5   | 0.152         | 0.070         |
| PPY/1-10    | 0.005         | 0.034         |
| PEDOT/1-5   | 0.079         | 0.137         |
| PEDOT/1-7.5 | 0.094         | 0.171         |
| PEDOT/1-10  | 0.049         | 0.061         |

## References

- 1 H. M. Rietveld, Line profiles of neutron powder-diffraction peaks for structure refinement, *Acta Crystallogr.*, 1967, **22**, 151-152.
